# Supplementary material
Source: publisher site journal article supplement (https://www.spandidos-publications.com/2017/downloadSupplementary)
Supplement: Supplementary file 1 [file downloadSupplementary]

Figure S1. Co-expression relationship between PAK4, HSPH1 and MATH score. (A) Co-expression relationship in the expression of PAK4 with MATH. (B) Co-expression relationship in the expression of HSPH1 with MATH. PAK4, serine/threonine p21-activated kinase 4; MATH, mutant-allele tumor heterogeneity; HSPH1, heat shock protein 105 kDa.

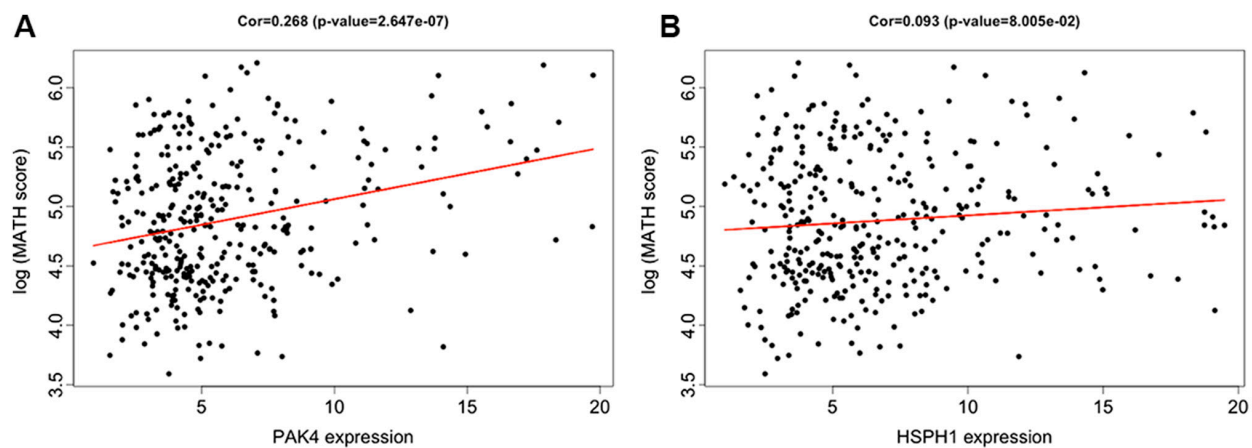

Table SI. Gene sets enriched in phenotype low MATH score group. KEGG, Kyoto Encyclopedia of Genes and Genomes; NES, normalized enrichment score; FDR, false discovery rate.

| KEGG                                              | SIZE | ES   | NES  | FDR q-val | FWER p-val |
|---------------------------------------------------|------|------|------|-----------|------------|
| KEGG_FATTY_ACID_METABOLISM                        | 42   | 0.83 | 4.23 | 0         | 0          |
| KEGG_VALINE_LEUCINE_AND_ISOLEUCINE_DEGRADATION    | 44   | 0.84 | 4.06 | 0         | 0          |
| KEGG_DRUG_METABOLISM_CYTOCHROME_P450              | 70   | 0.69 | 3.76 | 0         | 0          |
| KEGG_TRYPTOPHAN_METABOLISM                        | 39   | 0.72 | 3.63 | 0         | 0          |
| KEGG_RETINOL_METABOLISM                           | 63   | 0.68 | 3.58 | 0         | 0          |
| KEGG_PROPANOATE_METABOLISM                        | 32   | 0.79 | 3.52 | 0         | 0          |
| KEGG_GLYCINE_SERINE_AND_THREONINE_METABOLISM      | 31   | 0.76 | 3.51 | 0         | 0          |
| KEGG_BUTANOATE_METABOLISM                         | 34   | 0.75 | 3.46 | 0         | 0          |
| KEGG_PRIMARY_BILE_ACID_BIOSYNTHESIS               | 16   | 0.84 | 3.19 | 0         | 0          |
| KEGG_METABOLISM_OF_XENOBIOTICS_BY_CYTOCHROME_P450 | 68   | 0.56 | 2.97 | 0         | 0          |
| KEGG_LYSINE_DEGRADATION                           | 39   | 0.6  | 2.97 | 0         | 0          |
| KEGG_BETA_ALANINE_METABOLISM                      | 22   | 0.69 | 2.87 | 0         | 0          |
| KEGG_GLYCOLYSIS_GLUONEOGENESIS                    | 61   | 0.5  | 2.83 | 0         | 0          |
| KEGG_PYRUVATE_METABOLISM                          | 39   | 0.6  | 2.82 | 0         | 0          |
| KEGG_STEROID_HORMONE_BIOSYNTHESIS                 | 55   | 0.51 | 2.72 | 0         | 0          |
| KEGG_ASCORBATE_AND_ALDARATE_METABOLISM            | 25   | 0.65 | 2.63 | 0         | 0          |
| KEGG_HISTIDINE_METABOLISM                         | 27   | 0.55 | 2.51 | 0         | 0          |

Table SII. KEGG and GO enrichment analysis of immune genes. KEGG, Kyoto Encyclopedia of Genes and Genomes; GO, Gene Ontology; Count\_gene, enrichment immune genes; Benjamini, Benjamini value.

| Category     | Term                      | Count_gene       | P-Value               | Benjamini             |
|--------------|---------------------------|------------------|-----------------------|-----------------------|
| Go_TERM      | cell polarity             | ZO-1, TJAP1      | $9.4 \times 10^{-26}$ | $2.5 \times 10^{-22}$ |
| Go_TERM      | cell differentiation      | ZO-1, ZONAB      | $4 \times 10^{-19}$   | $5.3 \times 10^{-15}$ |
| Go_TERM      | cell proliferation        | ZO-1, ZONAB      | $1.1 \times 10^{-16}$ | $9.8 \times 10^{-14}$ |
| KEGG_PATHWAY | MicroRNAs in cancer       | PAK4, CAT1       | $2.1 \times 10^{-24}$ | $4.7 \times 10^{-22}$ |
| KEGG_PATHWAY | thyroid hormone signaling | PAK4, PKHR, PFKP | $8.5 \times 10^{-21}$ | $9.5 \times 10^{-19}$ |
| KEGG_PATHWAY | renal cellcarcinoma       | PAK4, SDHD, RAF1 | $1.3 \times 10^{-16}$ | $8.2 \times 10^{-15}$ |
| KEGG_PATHWAY | tight junctions           | JNK, MLC2, CD1   | $2.2 \times 10^{-16}$ | $1.2 \times 10^{-14}$ |
| KEGG_PATHWAY | herpes simplex infection  | IKKA, IKKB, IFA2 | $9.8 \times 10^{-16}$ | $4.4 \times 10^{-14}$ |
| KEGG_PATHWAY | ErbB signaling            | PAK4, JNK        | $7.2 \times 10^{-15}$ | $2.6 \times 10^{-13}$ |
